# Supplementary material for: The Piezocatalytic Degradation of Sulfadiazine by Lanthanum-Doped Barium Titanate
Source: MDPI journal article supplement (doi:10.3390/molecules29081719), 2024-04-10
Supplement: s1 [file molecules-2906907-supplementary.pdf › molecules-2906907-supplementary.pdf]

# The Piezocatalytic Degradation of Sulfadiazine by Lanthanum-Doped Barium Titanate

Daijun Meng <sup>†</sup>, Yuqi Xiang <sup>†</sup>, Ziwei Yang, Hao Yuan, Liang Tang <sup>‡</sup> and Shiyang Li <sup>\*‡</sup>

Key Laboratory of Organic Compound Pollution Control Engineering (MOE),  
School of Environmental and Chemical Engineering, Shanghai University,  
Shanghai 200444, China; tangliang@shu.edu.cn (L.T.)

\* Correspondence: lishiyang@shu.edu.cn; Tel./Fax: +86-21-65982592

<sup>†</sup> These authors contributed equally to this work.

<sup>‡</sup> These authors also contributed equally to this work.

Tabel S1 The  $k_{obs}$  and degradation efficiency of the tested groups in this study

| Catalysis dosage (g/L) | SDZ concentration (mg/L) | Label  | Condition | $k_{obs\_average}$ ( $\times 10^{-3} \text{ min}^{-1}$ ) | $k_{obs\_std}$ ( $\times 10^{-3} \text{ min}^{-1}$ ) | degradation efficiency (%) |
|------------------------|--------------------------|--------|-----------|----------------------------------------------------------|------------------------------------------------------|----------------------------|
| 0.5                    | 1                        | BTO    | -         | 17.51                                                    | 0.66                                                 | 65.06%                     |
| 0.5                    | 2.5                      | BTO    | -         | 9.35                                                     | 0.17                                                 | 44.12%                     |
| 1                      | 1                        | BTO    | -         | 30.79                                                    | 0.20                                                 | 86.08%                     |
| 1                      | 10                       | BTO    | -         | 6.20                                                     | 0.16                                                 | 31.50%                     |
| 1                      | 2.5                      | BTO    | -         | 13.29                                                    | 0.51                                                 | 56.08%                     |
| 1                      | 5                        | BTO    | -         | 8.16                                                     | 0.34                                                 | 40.17%                     |
| 1                      | 7.5                      | BTO    | -         | 7.36                                                     | 0.29                                                 | 34.79%                     |
| 1.5                    | 2.5                      | BTO    | -         | 18.94                                                    | 0.56                                                 | 68.60%                     |
| 1.5                    | 5                        | BTO    | -         | 6.28                                                     | 0.30                                                 | 31.48%                     |
| 2                      | 2.5                      | BTO    | -         | 20.76                                                    | 0.16                                                 | 70.36%                     |
| 2                      | 7.5                      | BTO    | -         | 4.76                                                     | 0.10                                                 | 24.02%                     |
| 2.5                    | 10                       | BTO    | -         | 5.64                                                     | 0.21                                                 | 28.42%                     |
| 2.5                    | 2.5                      | BTO    | -         | 8.43                                                     | 0.30                                                 | 38.66%                     |
| 0                      | 1                        | BTO    | -         | 0.91                                                     | 0.13                                                 | 5.23%                      |
| 1                      | 1                        | BTO    | no us     | 1.77                                                     | 0.05                                                 | 10.41%                     |
| 1                      | 1                        | BTO    | pH10      | 40.19                                                    | 2.52                                                 | 90.14%                     |
| 1                      | 1                        | BTO    | pH4       | 24.68                                                    | 1.34                                                 | 76.55%                     |
| 1                      | 1                        | BTO    | Cl-       | 24.33                                                    | 1.72                                                 | 76.93%                     |
| 1                      | 1                        | BTO    | NO3-      | 26.71                                                    | 0.79                                                 | 78.48%                     |
| 1                      | 1                        | BTO    | Mg2+      | 25.59                                                    | 1.08                                                 | 77.33%                     |
| 1                      | 1                        | BTO    | Ca2+      | 25.83                                                    | 0.61                                                 | 80.63%                     |
| 1                      | 1                        | BTO    | SO42-     | 35.59                                                    | 0.73                                                 | 88.65%                     |
| 1                      | 1                        | BTO    | TBA       | 19.95                                                    | 1.24                                                 | 68.62%                     |
| 1                      | 1                        | BTO    | p-BQ      | 4.99                                                     | 0.34                                                 | 26.02%                     |
| 1                      | 1                        | BTO    | EDTA-2Na  | 23.43                                                    | 0.44                                                 | 75.27%                     |
| 1                      | 1                        | BTO    | FFA       | 10.06                                                    | 0.55                                                 | 45.30%                     |
| 1                      | 1                        | BTO    | N2        | 2.01                                                     | 0.07                                                 | 12.02%                     |
| 1                      | 1                        | BTO    | Recycle1  | 30.49                                                    | -                                                    | 84.54%                     |
| 1                      | 1                        | BTO    | Recycle2  | 23.19                                                    | -                                                    | 76.51%                     |
| 1                      | 1                        | BTO    | Recycle3  | 20.45                                                    | -                                                    | 71.20%                     |
| 1                      | 1                        | BTO    | Recycle4  | 17.53                                                    | -                                                    | 63.51%                     |
| 1                      | 1                        | BTO    | Recycle5  | 11.55                                                    | -                                                    | 49.38%                     |
| 0.5                    | 1                        | BTO-La | -         | 16.23                                                    | 0.48                                                 | 61.10%                     |
| 0.5                    | 2.5                      | BTO-La | -         | 15.47                                                    | 0.50                                                 | 60.36%                     |
| 1                      | 1                        | BTO-La | -         | 37.83                                                    | 2.77                                                 | 89.06%                     |
| 1                      | 10                       | BTO-La | -         | 9.62                                                     | 0.24                                                 | 43.64%                     |
| 1                      | 2.5                      | BTO-La | -         | 15.73                                                    | 0.31                                                 | 60.99%                     |
| 1                      | 5                        | BTO-La | -         | 11.22                                                    | 0.17                                                 | 49.37%                     |
| 1                      | 7.5                      | BTO-La | -         | 9.72                                                     | 0.15                                                 | 42.77%                     |
| 1.5                    | 2.5                      | BTO-La | -         | 21.13                                                    | 0.98                                                 | 70.55%                     |
| 1.5                    | 5                        | BTO-La | -         | 6.26                                                     | 0.11                                                 | 30.53%                     |
| 2                      | 2.5                      | BTO-La | -         | 28.26                                                    | 0.81                                                 | 81.58%                     |
| 2                      | 7.5                      | BTO-La | -         | 4.20                                                     | 0.15                                                 | 22.05%                     |
| 2.5                    | 10                       | BTO-La | -         | 5.73                                                     | 0.21                                                 | 28.82%                     |

|     |     |        |              |       |      |        |
|-----|-----|--------|--------------|-------|------|--------|
| 2.5 | 2.5 | BTO-La | -            | 6.47  | 0.29 | 32.29% |
| 0   | 1   | BTO-La | -            | 0.73  | 0.08 | 4.39%  |
| 1   | 1   | BTO-La | no us        | 4.32  | 0.28 | 23.25% |
| 1   | 1   | BTO-La | pH10         | 51.55 | 0.33 | 95.21% |
| 1   | 1   | BTO-La | pH4          | 34.77 | 1.67 | 87.07% |
| 1   | 1   | BTO-La | Cl-          | 37.87 | 1.05 | 90.33% |
| 1   | 1   | BTO-La | NO3-         | 37.18 | 1.56 | 89.91% |
| 1   | 1   | BTO-La | Mg2+         | 32.04 | 1.18 | 85.11% |
| 1   | 1   | BTO-La | Ca2+         | 24.91 | 1.60 | 76.02% |
| 1   | 1   | BTO-La | SO42-        | 40.97 | 0.87 | 90.80% |
| 1   | 1   | BTO-La | TBA          | 27.85 | 1.37 | 79.87% |
| 1   | 1   | BTO-La | p-BQ         | 9.75  | 0.31 | 44.27% |
| 1   | 1   | BTO-La | EDTA-<br>2Na | 31.12 | 0.91 | 85.25% |
| 1   | 1   | BTO-La | FFA          | 13.60 | 0.28 | 56.11% |
| 1   | 1   | BTO-La | N2           | 1.81  | 0.07 | 10.53% |
| 1   | 1   | BTO-La | Recycle1     | 39.27 | -    | 90.14% |
| 1   | 1   | BTO-La | Recycle2     | 33.45 | -    | 85.41% |
| 1   | 1   | BTO-La | Recycle3     | 29.19 | -    | 84.92% |
| 1   | 1   | BTO-La | Recycle4     | 23.40 | -    | 75.46% |
| 1   | 1   | BTO-La | Recycle5     | 19.83 | -    | 72.32% |

‘-’ in labels means under normal ultrasound activation, ‘-’ in std means no parallel test have been done.

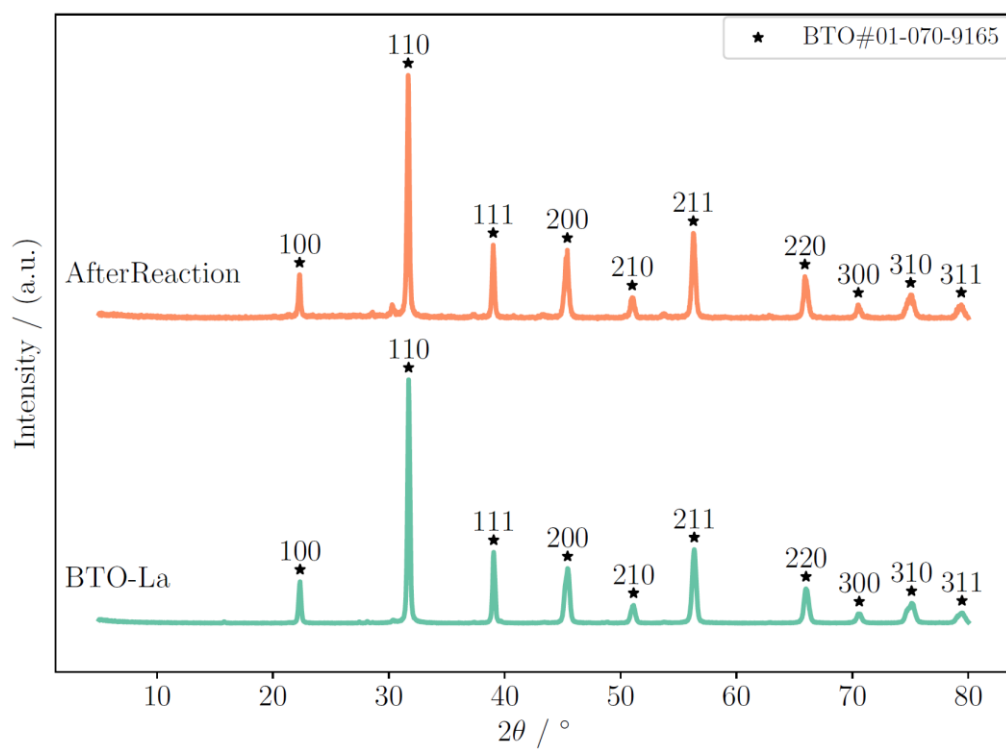

Figure S1. XRD patterns of as-prepared and after-recycle-reaction of BTO-La.

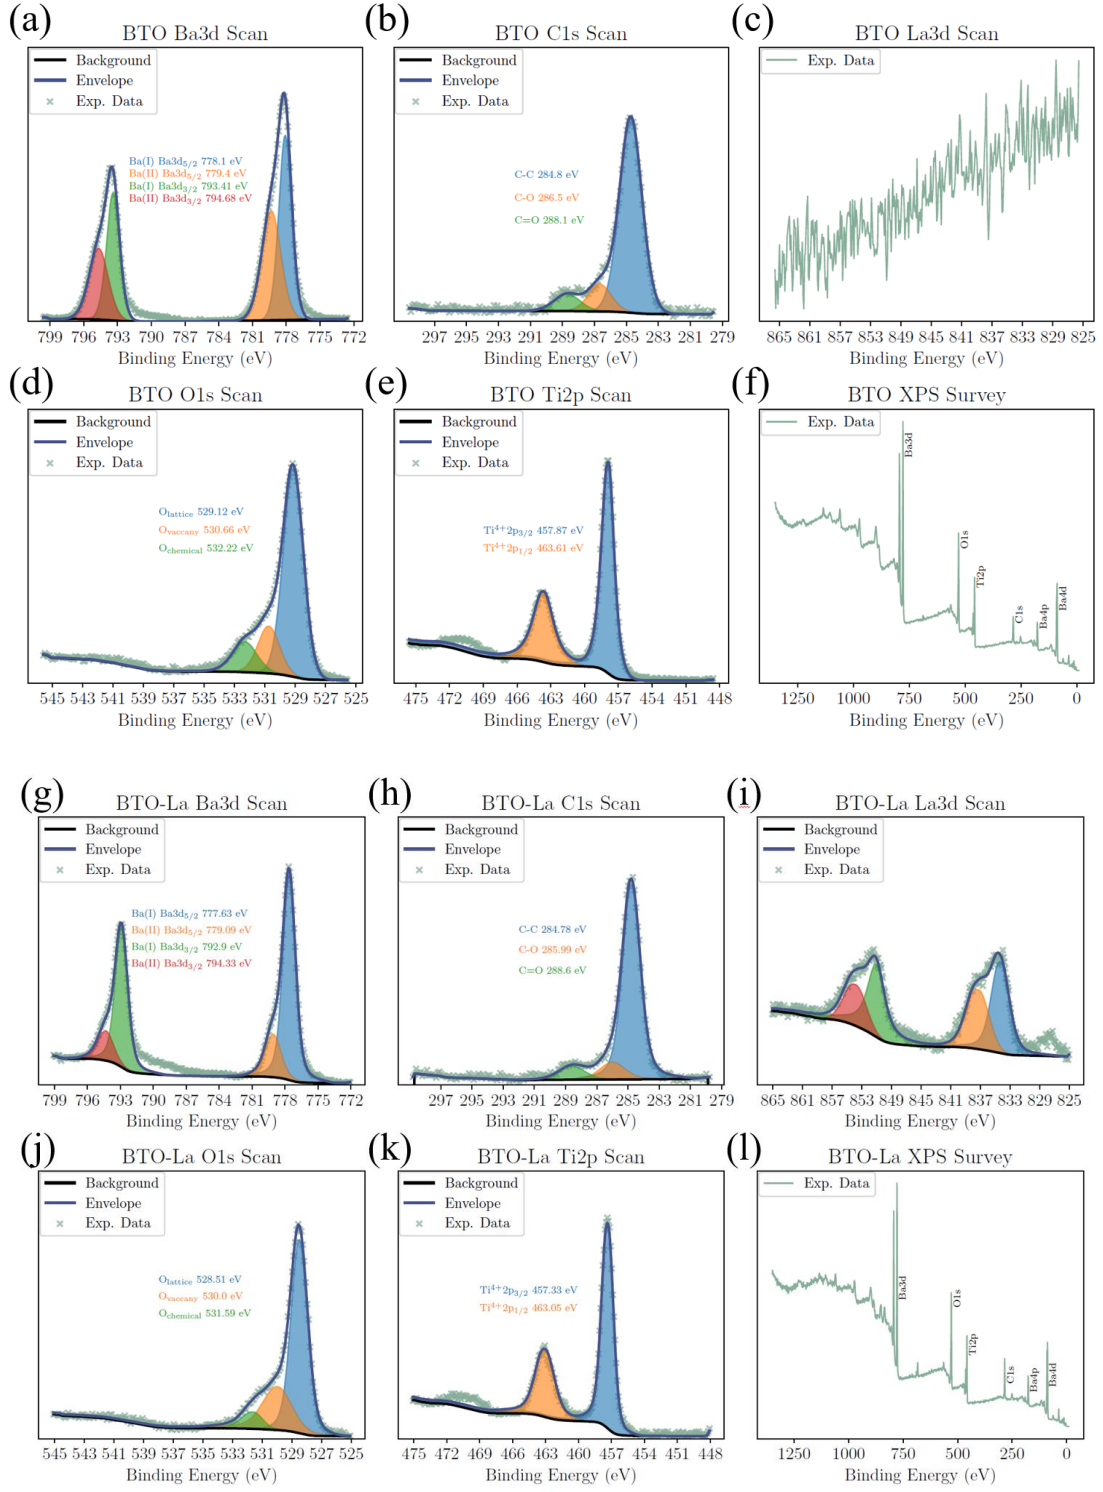

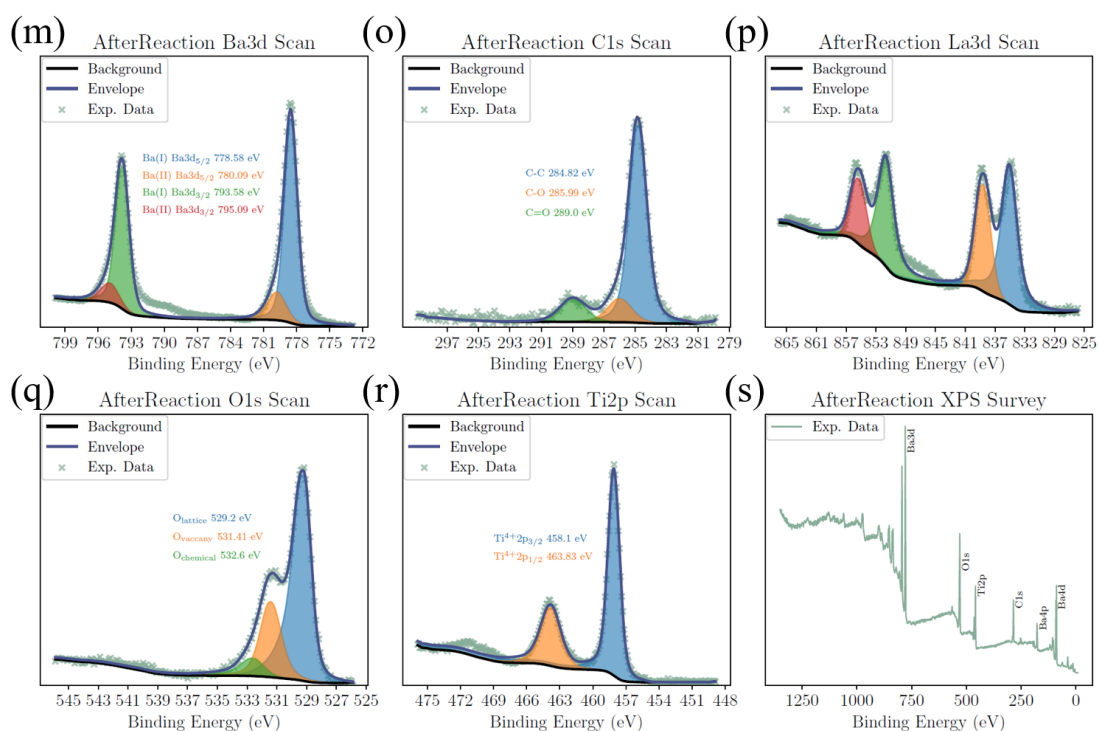

Figure S2. XPS survey and fine scan of as-prepared BTO (a-f), BTO-La(g-l) and after-recycle-reaction of BTO-La (m-s).

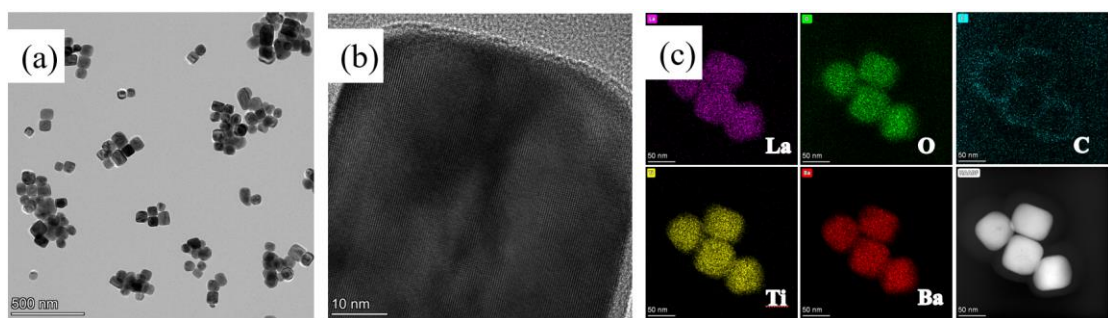

Figure S3. HR-TEM graphs at low (a) and high (b) magnification, and EDS mapping of after-recycle-rection of BTO-La (c)

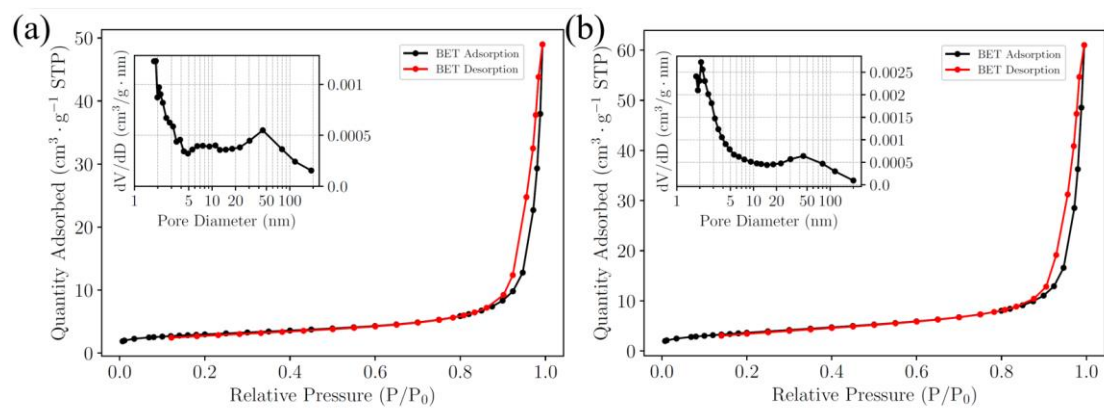

Figure S4. Nitrogen adsorption-desorption isotherms and insets (the corresponding pore size distribution curves) of BTO (a) and BTO-La (b)



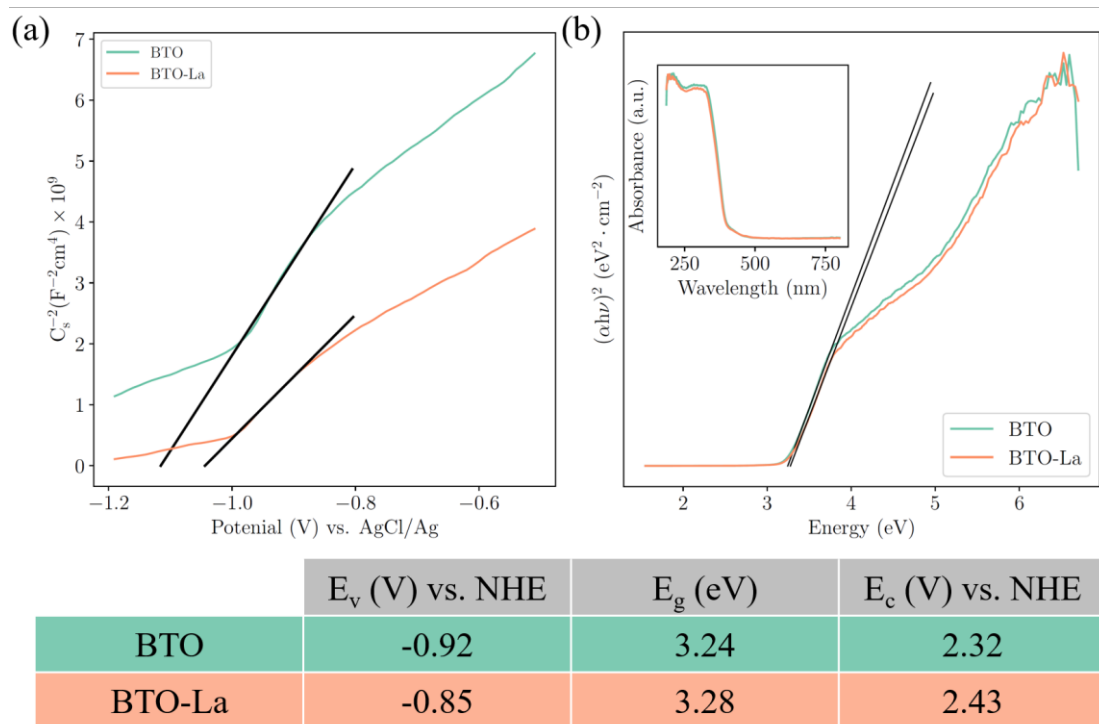

Figure S5. Mott-Schottky curves (a) and Tauc plot (b) result of BTO and BTO-La. The inset in (b) is absorbance while performing UV-DRS test. Corresponding columns of table below the plots are valance position, band gap and conduction position.

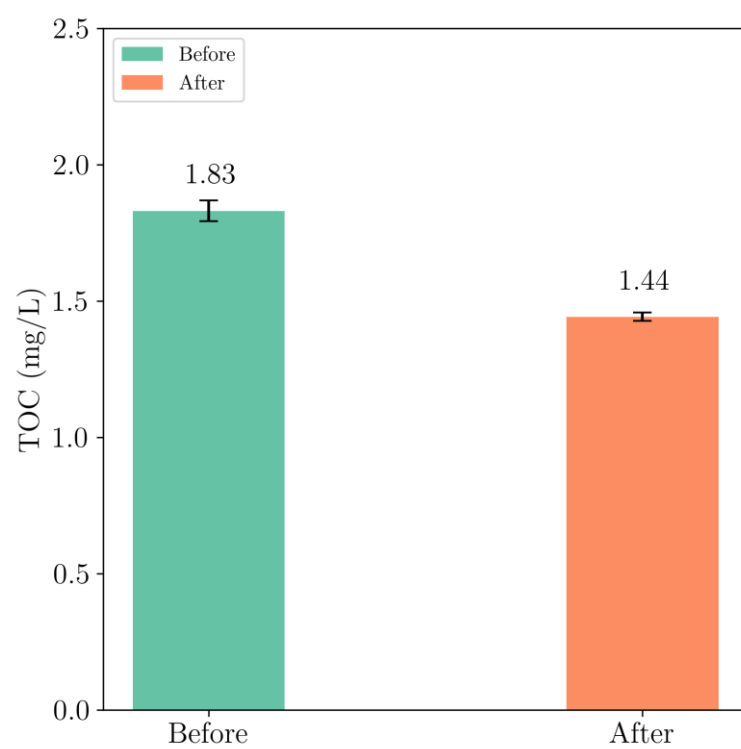

Figure S6. TOC of experimental solution before and after reaction with 1 mg/L SDZ and 1 g/L BTO-La

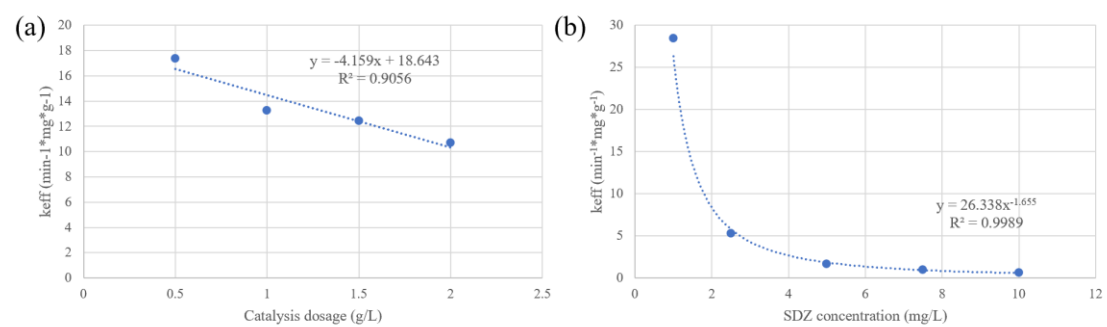

Figure S7. Correlation between  $k_{eff}$  and catalysis dosage (a); SDZ concentration (b).

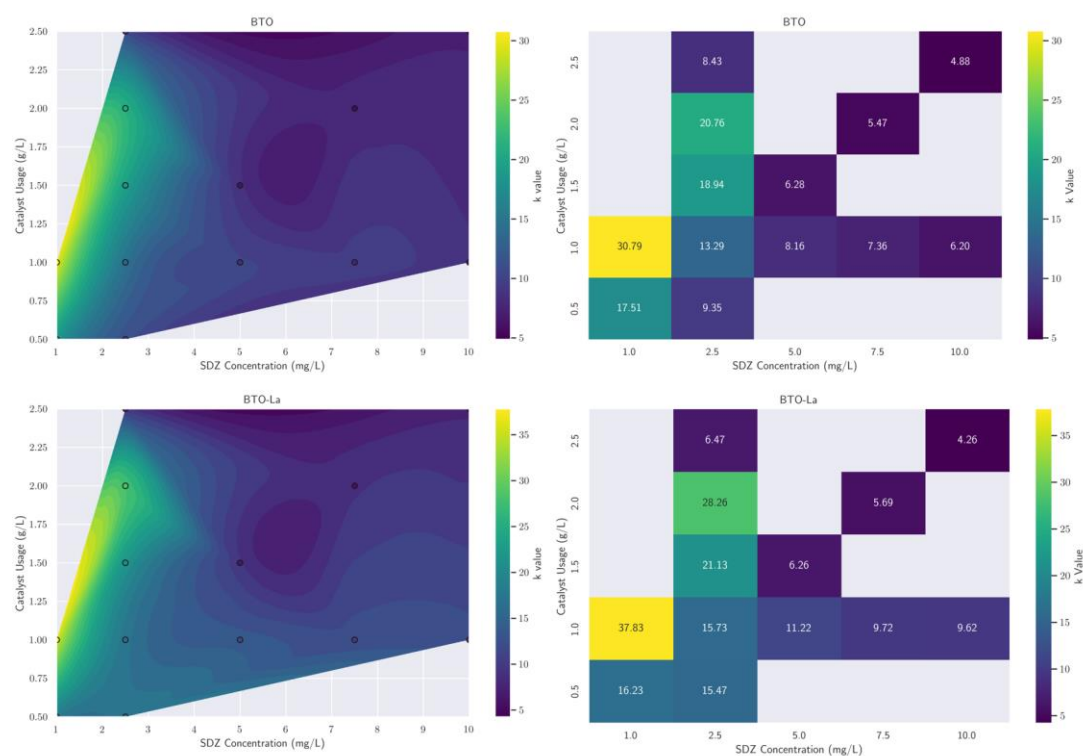

Figure S8. Heatmap of  $k$  as the function of SDZ concentration and catalyst dosage (left column) and actual test point (right column).

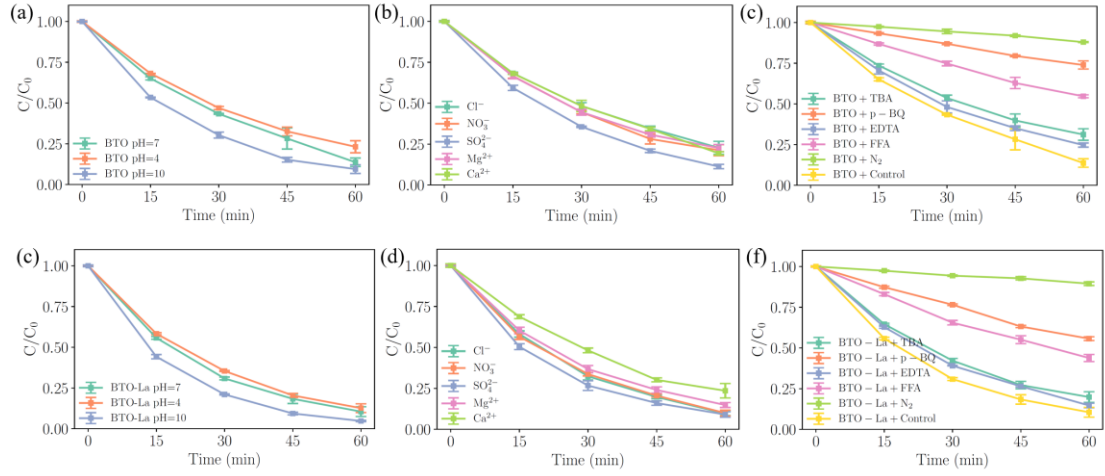

Figure S9. The degradation process of SDZ with BTO under various pH (a); background constituent (b); radical scavengers (c); with BTO-La; under various pH (e); background constituent (d); radical scavengers (f)
